# Supplementary material
Source: Springer Nature journal article supplement (https://www.springermedizin.de/resource/supplementary/13229_2011_34_MOESM2_ESM.PDF/9676016)
Supplement: MOESM2 [file 9676016]

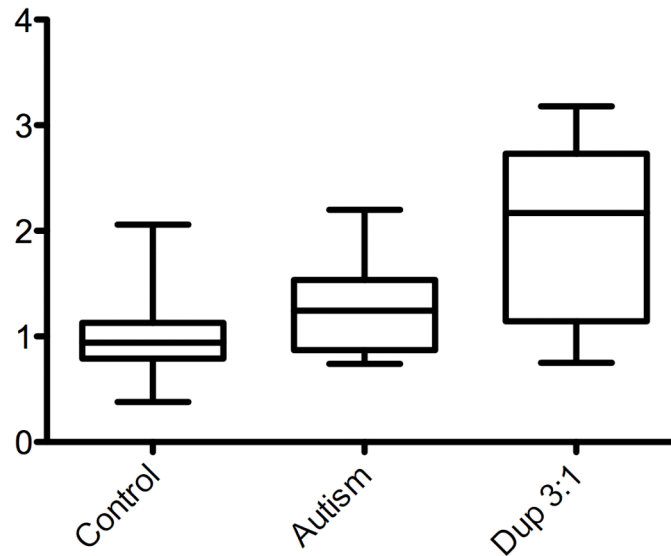

***UBE3A* transcript levels are significantly higher in Dup15q 3:1 copy number samples as compared to control and autism brain.** Fold change vs. genotype for *UBE3A* levels in brain. Although somewhat variable, the duplication samples with 3:1 duplication ratios were significantly higher than the control group ( $t$ -test  $p=0.0148$  for control with Welch's correction) but not the autism group. The whisker bars are maximum and minimum values in each group and the middle bar is the mean expression value.
